# Supplementary material for: Defects in an orthorhombic MoAlB MAB phase thin film grown at moderate synthesis temperature
Source: Royal Society of Chemistry journal article supplement (doi:10.1039/d1nr07792a), 2022-01-01
Supplement: d1nr07792a1.pdf [file d1nr07792a1.pdf]

## Defects in an orthorhombic MoAlB MAB phase thin film grown at moderate synthesis temperature

Rajib Sahu<sup>\*a,b</sup>, Dimitri Bogdanovski<sup>b</sup>, Jan-Ole Achenbach<sup>b</sup>, Jochen M Schneider<sup>a,b</sup> and Christina Scheu<sup>\*a,c</sup>

<sup>a</sup>Max-Planck-Institut für Eisenforschung GmbH, Max-Planck-Str. 1, 40237 Düsseldorf, Germany

<sup>b</sup>Materials Chemistry, RWTH Aachen University, Kopernikusstr. 10, 52074 Aachen, Germany

<sup>c</sup>Materials Analytics, RWTH Aachen University, Kopernikusstr. 10, 52074 Aachen, Germany

\*Corresponding authors: r.sahu@mpie.de, c.scheu@mpie.de

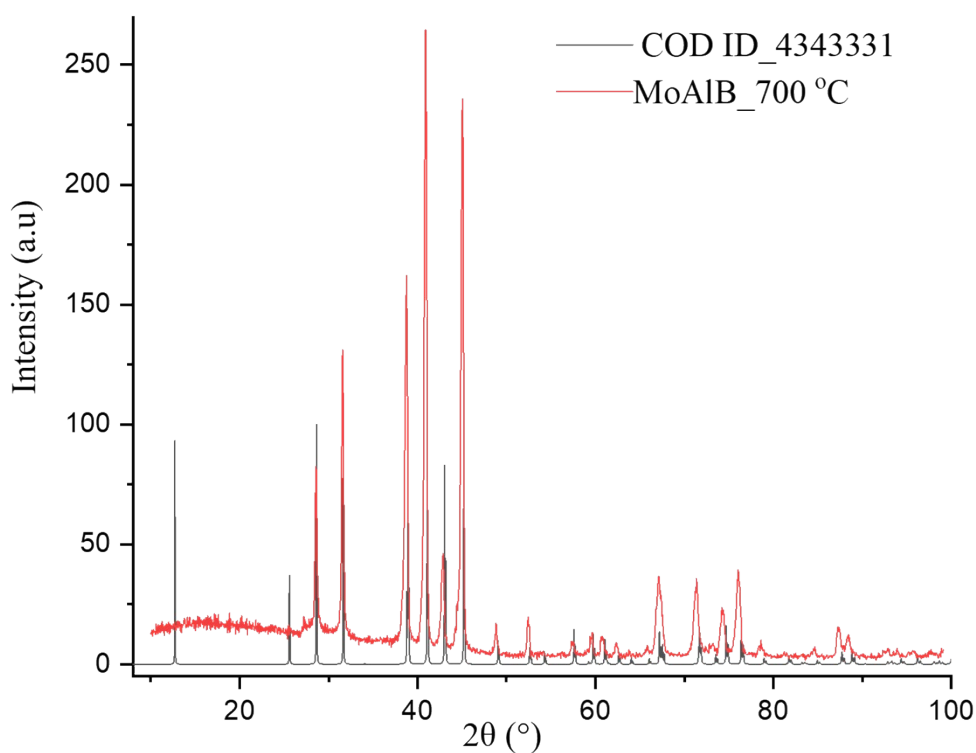

Fig. S1: X-ray diffraction data of the MoAlB film grown by DC magnetron sputtering. Reference pattern and reference card number are taken from Crystallography Open Database [1].

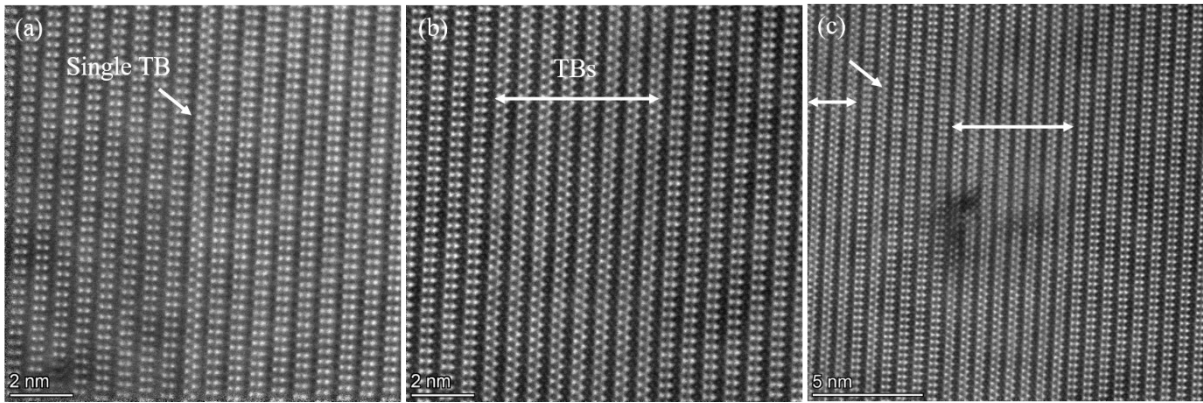

Fig. S2: High resolution HAADF STEM micrographs in (a)-(c) represent single-unit wide (white arrow) to several-nanometer-wide twin domains (double headed arrows) within different grains.

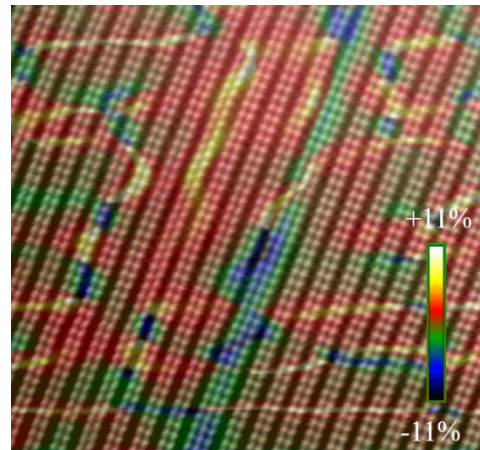

Fig. S3: Local phase map showing relative interplanar differences along  $\epsilon_{yy}$ .

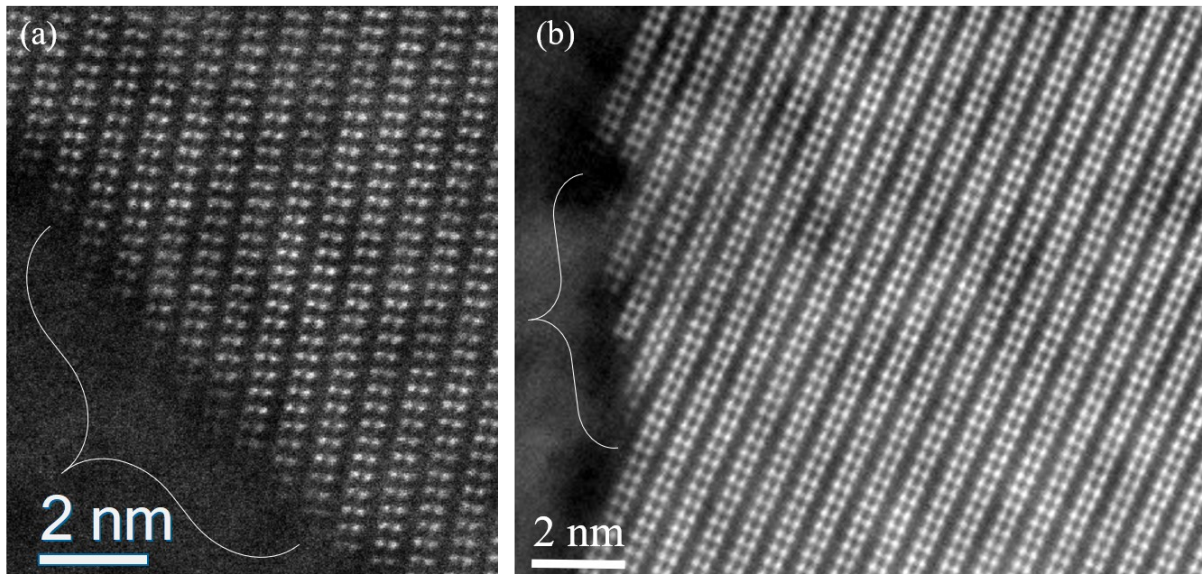

Fig. S4: HAADF STEM micrographs showing faceted grain boundaries from two different areas (a) and (b).

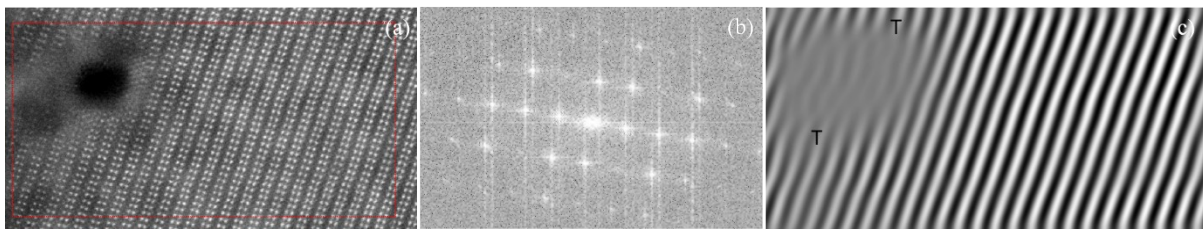

Fig. S5: Inverse fast Fourier transformation (IFFT) of area (a) is performed using FFT image in (b). (c) Lattice fringes over the 3D amorphous region show a discontinuity.

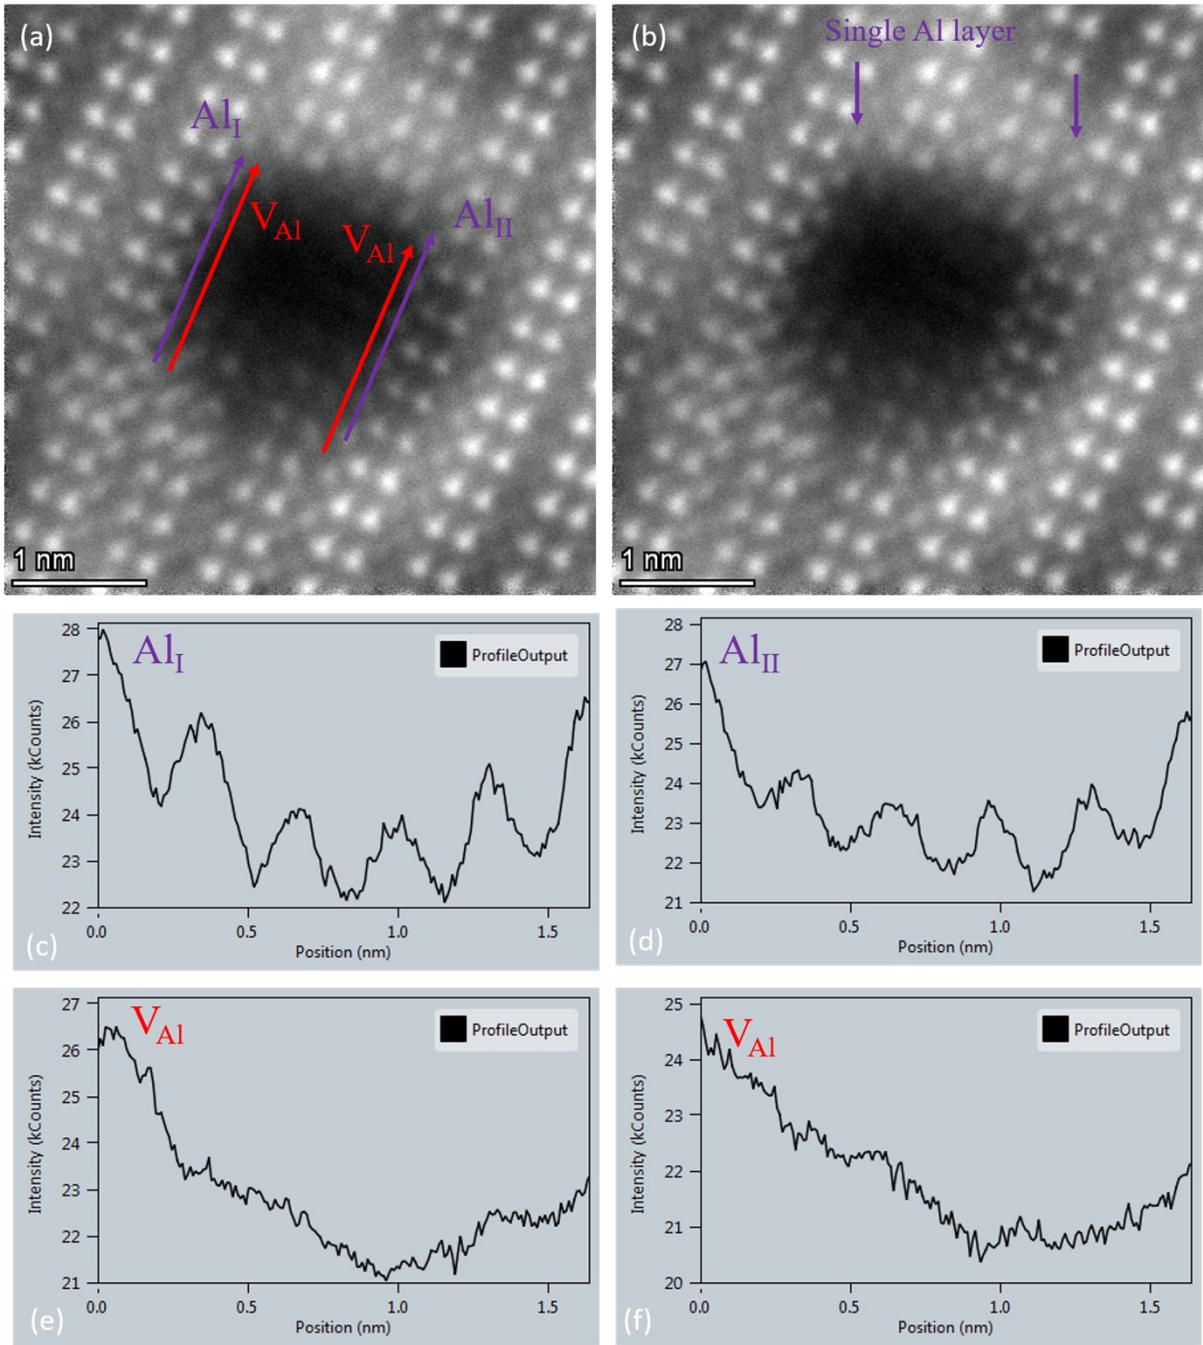

Fig. S6: (a) Presence of single-layer Al at the vicinity of the 3D cluster is denoted by Al<sub>I</sub> and Al<sub>II</sub> and the vacant columns are marked by V<sub>Al</sub>. Corresponding line profile are drawn in (c)-(f). Al atoms in single layer are indicated by violet arrows in the HAADF STEM micrographs (b).

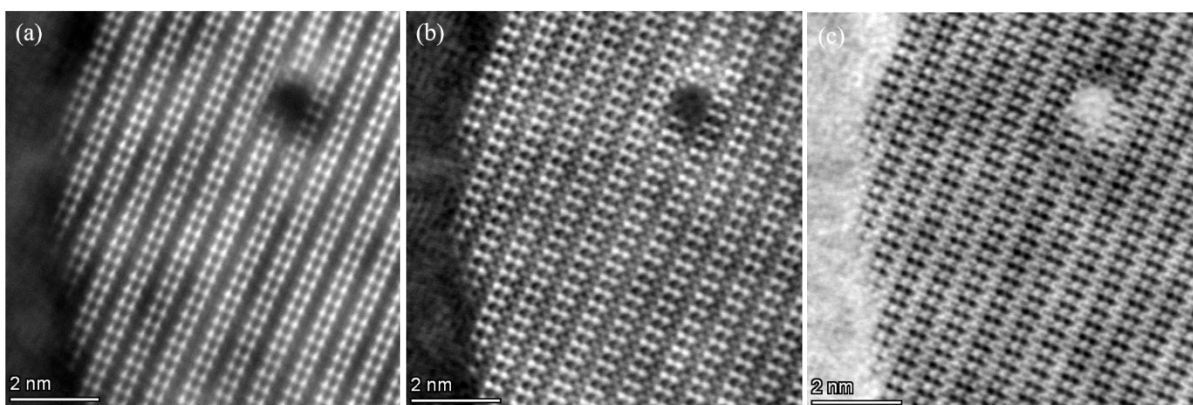

Fig. S7: Simultaneously acquired (a) HAADF, (b) ADF and (c) ABF STEM images of the grain boundary are shown here.

## References

1. M. Ade and H. Hillebrecht, Ternary Borides  $\text{Cr}_2\text{AlB}_2$ ,  $\text{Cr}_3\text{AlB}_4$ , and  $\text{Cr}_4\text{AlB}_6$ : The First Members of the Series  $(\text{CrB}_2)_n\text{CrAl}$  with  $n = 1, 2, 3$  and a Unifying Concept for Ternary Borides as MAB-Phases, *Inorg. Chem.*, 2015, **54**(13), 6122-6135.
